# Supplementary material
Source: Research Square preprint supplement (doi:10.21203/rs.3.rs-9344370/v1)
Supplement: Supplementary file 2 [file c6764ffe2f400c25f76ed709.xlsx]

## Sheet: Sheet 1 - qc_pass_312_master_me
sample_id	assigned_type	subtype_label	organism	host	country	geo_loc_name	collection_date_iso	collection_date_bankit	gender	age_group	ari_sari	clade	g_clade
RSVB1-B53-44SV230013826	A	RSV-A	Human respiratory syncytial virus	Homo sapiens	United Arab Emirates	United Arab Emirates	2023-11-03	03-Nov-2023	Female	0-1	SARI	A.D.5.1	GA2.3.5
RSVB2-B68-44SV230013081	A	RSV-A	Human respiratory syncytial virus	Homo sapiens	United Arab Emirates	United Arab Emirates	2023-10-26	26-Oct-2023	Female	0-1	SARI	A.D.5.1	GA2.3.5
RSVB2-B69-02SV230013349	A	RSV-A	Human respiratory syncytial virus	Homo sapiens	United Arab Emirates	United Arab Emirates	2023-10-29	29-Oct-2023	Female	0-1	SARI	A.D.3	GA2.3.5
RSVB2-B72-44SV230014244	A	RSV-A	Human respiratory syncytial virus	Homo sapiens	United Arab Emirates	United Arab Emirates	2023-11-07	07-Nov-2023	Male	0-1	SARI	A.D.3.3	GA2.3.5
RSVB2-B73-44SV230014193	A	RSV-A	Human respiratory syncytial virus	Homo sapiens	United Arab Emirates	United Arab Emirates	2023-11-07	07-Nov-2023	Male	1-5	SARI	A.D.5.1	GA2.3.5
RSVB2-B74-44SV230014311	A	RSV-A	Human respiratory syncytial virus	Homo sapiens	United Arab Emirates	United Arab Emirates	2023-11-08	08-Nov-2023	Male	0-1	SARI	A.D.3.3	GA2.3.5
RSVB2-B75-02SV2300144310	A	RSV-A	Human respiratory syncytial virus	Homo sapiens	United Arab Emirates	United Arab Emirates	2023-11-08	08-Nov-2023	Male	0-1	SARI	A.D.5.1	GA2.3.5
RSVB2-B76-01SV230013673	A	RSV-A	Human respiratory syncytial virus	Homo sapiens	United Arab Emirates	United Arab Emirates	2023-11-01	01-Nov-2023	Female	1-5	ARI	A.D.1	GA2.3.5
RSVB2-B77-44SV230014040	A	RSV-A	Human respiratory syncytial virus	Homo sapiens	United Arab Emirates	United Arab Emirates	2023-11-06	06-Nov-2023	Male	0-1	SARI	A.D.3.1	GA2.3.5
RSVB2-B78-44SV230013273	A	RSV-A	Human respiratory syncytial virus	Homo sapiens	United Arab Emirates	United Arab Emirates	2023-10-28	28-Oct-2023	Male	1-5	SARI	A.D.5.2	GA2.3.5
RSVB2-B80-44SV230013221	A	RSV-A	Human respiratory syncytial virus	Homo sapiens	United Arab Emirates	United Arab Emirates	2023-10-27	27-Oct-2023	Male	1-5	SARI	A.D.3	GA2.3.5
RSVB2-B81-44SV230016970	A	RSV-A	Human respiratory syncytial virus	Homo sapiens	United Arab Emirates	United Arab Emirates	2023-12-07	07-Dec-2023	Female	1-5	SARI	A.D.3.3	GA2.3.5
RSVB2-B82-44SV230017654	A	RSV-A	Human respiratory syncytial virus	Homo sapiens	United Arab Emirates	United Arab Emirates	2023-12-16	16-Dec-2023	Female	1-5	SARI	A.D.1	GA2.3.5
RSVB2-B83-08SV230017774	A	RSV-A	Human respiratory syncytial virus	Homo sapiens	United Arab Emirates	United Arab Emirates	2023-12-18	18-Dec-2023	Female	1-5	ARI	A.D.1	GA2.3.5
RSVB2-B84-01SV230017845	A	RSV-A	Human respiratory syncytial virus	Homo sapiens	United Arab Emirates	United Arab Emirates	2023-12-19	19-Dec-2023	Female	1-5	ARI	A.D.5.2	GA2.3.5
RSVB2-B85-01SV230017846	A	RSV-A	Human respiratory syncytial virus	Homo sapiens	United Arab Emirates	United Arab Emirates	2023-12-19	19-Dec-2023	Female	1-5	ARI	A.D.5.2	GA2.3.5
RSVB2-B86-02SV230018257	A	RSV-A	Human respiratory syncytial virus	Homo sapiens	United Arab Emirates	United Arab Emirates	2023-12-23	23-Dec-2023	Male	18-35	SARI	A.D.1	GA2.3.5
RSVB2-B87-02SV240003449	A	RSV-A	Human respiratory syncytial virus	Homo sapiens	United Arab Emirates	United Arab Emirates	2024-02-06	06-Feb-2024	Male	0-1	ARI	A.D.1	GA2.3.5
RSVB2-B88-44SV230013193	A	RSV-A	Human respiratory syncytial virus	Homo sapiens	United Arab Emirates	United Arab Emirates	2023-10-27	27-Oct-2023	Female	0-1	SARI	A.D.5.2	GA2.3.5
RSVB2-B89-15SV230014002	A	RSV-A	Human respiratory syncytial virus	Homo sapiens	United Arab Emirates	United Arab Emirates	2023-11-05	05-Nov-2023	Female	10-18	ARI	A.D.1	GA2.3.5
RSVB2-B90-15SV230014741	A	RSV-A	Human respiratory syncytial virus	Homo sapiens	United Arab Emirates	United Arab Emirates	2023-11-12	12-Nov-2023	Female	35-55	ARI	A.D.1	GA2.3.5
RSVB2-B91-18SV230014384	A	RSV-A	Human respiratory syncytial virus	Homo sapiens	United Arab Emirates	United Arab Emirates	2023-11-08	08-Nov-2023	Male	1-5	ARI	A.D.1	GA2.3.5
RSVB2-B92-15SV230014604	A	RSV-A	Human respiratory syncytial virus	Homo sapiens	United Arab Emirates	United Arab Emirates	2023-11-10	10-Nov-2023	Female	18-35	ARI	A.D.5.1	GA2.3.5
RSVB2-B93-44SV230013853	A	RSV-A	Human respiratory syncytial virus	Homo sapiens	United Arab Emirates	United Arab Emirates	2023-11-03	03-Nov-2023	Male	0-1	SARI	A.D.5.2	GA2.3.5
RSVB2-B94-44SV230013951	A	RSV-A	Human respiratory syncytial virus	Homo sapiens	United Arab Emirates	United Arab Emirates	2023-11-05	05-Nov-2023	Male	0-1	SARI	A.D.5.2	GA2.3.5
RSVB2-B95-02SV230013846	A	RSV-A	Human respiratory syncytial virus	Homo sapiens	United Arab Emirates	United Arab Emirates	2023-11-02	02-Nov-2023	Female	1-5	SARI	A.D.3.1	GA2.3.5
RSVB4-B59-44SV230016088	A	RSV-A	Human respiratory syncytial virus	Homo sapiens	United Arab Emirates	United Arab Emirates	2023-11-26	26-Nov-2023	Male	0-1	SARI	A.D.1	GA2.3.5
RSVB4-B60-02SV230015565	A	RSV-A	Human respiratory syncytial virus	Homo sapiens	United Arab Emirates	United Arab Emirates	2023-11-20	20-Nov-2023	Female	1-5	SARI	A.D.3.3	GA2.3.5
RSVB4-B61-44SV230017516	A	RSV-A	Human respiratory syncytial virus	Homo sapiens	United Arab Emirates	United Arab Emirates	2023-12-14	14-Dec-2023	Male	0-1	SARI	A.D.3.3	GA2.3.5
RSVB4-B62-44SV230016729	A	RSV-A	Human respiratory syncytial virus	Homo sapiens	United Arab Emirates	United Arab Emirates	2023-12-05	05-Dec-2023	Male	0-1	SARI	A.D.5.2	GA2.3.5
RSVB4-B63-01SV230017318	A	RSV-A	Human respiratory syncytial virus	Homo sapiens	United Arab Emirates	United Arab Emirates	2023-12-12	12-Dec-2023	Male	0-1	ARI	A.D.1	GA2.3.5
RSVB4-B64-44SV230016625	A	RSV-A	Human respiratory syncytial virus	Homo sapiens	United Arab Emirates	United Arab Emirates	2023-12-03	03-Dec-2023	Female	0-1	SARI	A.D.5.3	GA2.3.5
RSVB4-B65-02SV230016458	A	RSV-A	Human respiratory syncytial virus	Homo sapiens	United Arab Emirates	United Arab Emirates	2023-11-29	29-Nov-2023	Female	0-1	SARI	A.D.5.1	GA2.3.5
RSVB4-B66-44SV230011636	A	RSV-A	Human respiratory syncytial virus	Homo sapiens	United Arab Emirates	United Arab Emirates	2023-10-09	09-Oct-2023	Male	0-1	SARI	A.D.3.3	GA2.3.5
RSVB4-B67-01SV230017317	A	RSV-A	Human respiratory syncytial virus	Homo sapiens	United Arab Emirates	United Arab Emirates	2023-12-12	12-Dec-2023	Female	1-5	ARI	A.D.1	GA2.3.5
RSVB4-B68-02SV230017287	A	RSV-A	Human respiratory syncytial virus	Homo sapiens	United Arab Emirates	United Arab Emirates	2023-12-12	12-Dec-2023	Male	1-5	SARI	A.D.3	GA2.3.5
RSVB4-B70-44SV230015489	A	RSV-A	Human respiratory syncytial virus	Homo sapiens	United Arab Emirates	United Arab Emirates	2023-11-20	20-Nov-2023	Male	0-1	SARI	A.D.3.3	GA2.3.5
RSVB4-B71-02SV230011829	A	RSV-A	Human respiratory syncytial virus	Homo sapiens	United Arab Emirates	United Arab Emirates	2023-10-10	10-Oct-2023	Male	1-5	SARI	A.D.1	GA2.3.5
RSVB4-B73-15SV230016521	A	RSV-A	Human respiratory syncytial virus	Homo sapiens	United Arab Emirates	United Arab Emirates	2023-12-01	01-Dec-2023	Male	55	ARI	A.D.5.1	GA2.3.5
RSVB4-B74-44SV230011562	A	RSV-A	Human respiratory syncytial virus	Homo sapiens	United Arab Emirates	United Arab Emirates	2023-10-07	07-Oct-2023	Female	0-1	SARI	A.D.5.1	GA2.3.5
RSVB4-B75-01SV230011524	A	RSV-A	Human respiratory syncytial virus	Homo sapiens	United Arab Emirates	United Arab Emirates	2023-10-06	06-Oct-2023	Male	0-1	SARI	A.D.3	GA2.3.5
RSVB4-B76-44SV230015757	A	RSV-A	Human respiratory syncytial virus	Homo sapiens	United Arab Emirates	United Arab Emirates	2023-11-22	22-Nov-2023	Female	1-5	SARI	A.D.3.3	GA2.3.5
RSVB4-B77-02SV230015845	A	RSV-A	Human respiratory syncytial virus	Homo sapiens	United Arab Emirates	United Arab Emirates	2023-11-22	22-Nov-2023	Female	0-1	SARI	A.D.5.1	GA2.3.5
RSVB4-B78-02SV230011712	A	RSV-A	Human respiratory syncytial virus	Homo sapiens	United Arab Emirates	United Arab Emirates	2023-10-08	08-Oct-2023	Male	1-5	SARI	A.D.1	GA2.3.5
RSVB4-B79-44SV230011606	A	RSV-A	Human respiratory syncytial virus	Homo sapiens	United Arab Emirates	United Arab Emirates	2023-10-08	08-Oct-2023	Female	1-5	SARI	A.D.5.3	GA2.3.5
RSVB4-B80-02SV230012067	A	RSV-A	Human respiratory syncytial virus	Homo sapiens	United Arab Emirates	United Arab Emirates	2023-10-13	13-Oct-2023	Male	1-5	SARI	A.D.5.3	GA2.3.5
RSVB4-B81-18SV230011804	A	RSV-A	Human respiratory syncytial virus	Homo sapiens	United Arab Emirates	United Arab Emirates	2023-10-10	10-Oct-2023	Male	5-10	ARI	A.D.5.1	GA2.3.5
RSVB4-B82-01SV230012341	A	RSV-A	Human respiratory syncytial virus	Homo sapiens	United Arab Emirates	United Arab Emirates	2023-10-17	17-Oct-2023	Female	0-1	SARI	A.D.1	GA2.3.5
RSVB4-B83-02SV230005130	A	RSV-A	Human respiratory syncytial virus	Homo sapiens	United Arab Emirates	United Arab Emirates	2023-05-02	02-May-2023	Male	1-5	SARI	A.D.1.4	GA2.3.5
RSVB4-B84-08SV230017328	A	RSV-A	Human respiratory syncytial virus	Homo sapiens	United Arab Emirates	United Arab Emirates	2023-12-12	12-Dec-2023	Male	1-5	ARI	A.D.5.3	GA2.3.5
RSVB4-B85-45SV230000800	A	RSV-A	Human respiratory syncytial virus	Homo sapiens	United Arab Emirates	United Arab Emirates	2023-01-23	23-Jan-2023	Female	18-35	ARI	A.D.3	GA2.3.5
RSVB4-B87-44SV230004135	A	RSV-A	Human respiratory syncytial virus	Homo sapiens	United Arab Emirates	United Arab Emirates	2023-04-06	06-Apr-2023	Male	0-1	SARI	A.D.3	GA2.3.5
RSVB4-B88-01SV230003288	A	RSV-A	Human respiratory syncytial virus	Homo sapiens	United Arab Emirates	United Arab Emirates	2023-03-18	18-Mar-2023	Female	0-1	SARI	A.D.3	GA2.3.5
RSVB4-B89-02SV230011704	A	RSV-A	Human respiratory syncytial virus	Homo sapiens	United Arab Emirates	United Arab Emirates	2023-10-09	09-Oct-2023	Male	0-1	SARI	A.D.3.3	GA2.3.5
RSVB4-B90-02SV230012070	A	RSV-A	Human respiratory syncytial virus	Homo sapiens	United Arab Emirates	United Arab Emirates	2023-10-13	13-Oct-2023	Male	1-5	SARI	A.D.5.1	GA2.3.5
RSVB4-B91-01SV230003384	A	RSV-A	Human respiratory syncytial virus	Homo sapiens	United Arab Emirates	United Arab Emirates	2023-03-20	20-Mar-2023	Female	1-5	SARI	A.D.1.4	GA2.3.5
RSVB4-B92-08SV230008111	A	RSV-A	Human respiratory syncytial virus	Homo sapiens	United Arab Emirates	United Arab Emirates	2023-07-18	18-Jul-2023	Male	0-1	ARI	A.D.5.1	GA2.3.5
RSVB4-B93-02SV230011064	A	RSV-A	Human respiratory syncytial virus	Homo sapiens	United Arab Emirates	United Arab Emirates	2023-09-30	30-Sep-2023	Female	1-5	SARI	A.D.5.1	GA2.3.5
RSVB4-B94-44SV230011550	A	RSV-A	Human respiratory syncytial virus	Homo sapiens	United Arab Emirates	United Arab Emirates	2023-10-07	07-Oct-2023	Female	1-5	SARI	A.D.5.3	GA2.3.5
RSVB4-B95-44SV230011683	A	RSV-A	Human respiratory syncytial virus	Homo sapiens	United Arab Emirates	United Arab Emirates	2023-10-09	09-Oct-2023	Male	0-1	SARI	A.D.3.3	GA2.3.5
RSVB4-B96-44SV230012211	A	RSV-A	Human respiratory syncytial virus	Homo sapiens	United Arab Emirates	United Arab Emirates	2023-10-16	16-Oct-2023	Female	0-1	SARI	A.D.3	GA2.3.5
RSVB1-B02-02SV230011954	B	RSV-B	Human respiratory syncytial virus	Homo sapiens	United Arab Emirates	United Arab Emirates	2023-10-09	09-Oct-2023	Male	1-5	ARI	B.D.4.1.1	GB5.0.5a
RSVB1-B03-02SV230011956	B	RSV-B	Human respiratory syncytial virus	Homo sapiens	United Arab Emirates	United Arab Emirates	2023-10-10	10-Oct-2023	Female	1-5	ARI	B.D.4.1.1	GB5.0.5a
RSVB1-B05-44SV230013080	B	RSV-B	Human respiratory syncytial virus	Homo sapiens	United Arab Emirates	United Arab Emirates	2023-10-26	26-Oct-2023	Female	1-5	SARI	B.D.E.1	GB5.0.5a
RSVB1-B06-02SV230011949	B	RSV-B	Human respiratory syncytial virus	Homo sapiens	United Arab Emirates	United Arab Emirates	2023-10-09	09-Oct-2023	Female	55	ARI	B.D.E.1	GB5.0.5a
RSVB1-B07-18SV230012948	B	RSV-B	Human respiratory syncytial virus	Homo sapiens	United Arab Emirates	United Arab Emirates	2023-10-24	24-Oct-2023	Female	18-35	ARI	B.D.4.1.1	GB5.0.5a
RSVB1-B08-18SV230012838	B	RSV-B	Human respiratory syncytial virus	Homo sapiens	United Arab Emirates	United Arab Emirates	2023-10-23	23-Oct-2023	Male	1-5	ARI	B.D.4.1.1	GB5.0.5a
RSVB1-B09-02SV230013155	B	RSV-B	Human respiratory syncytial virus	Homo sapiens	United Arab Emirates	United Arab Emirates	2023-10-26	26-Oct-2023	Female	1-5	SARI	B.D.E.1	GB5.0.5a
RSVB1-B10-02SV230012881	B	RSV-B	Human respiratory syncytial virus	Homo sapiens	United Arab Emirates	United Arab Emirates	2023-10-21	21-Oct-2023	Female	1-5	ARI	B.D.E.1	GB5.0.5a
RSVB1-B11-02SV230012891	B	RSV-B	Human respiratory syncytial virus	Homo sapiens	United Arab Emirates	United Arab Emirates	2023-10-19	19-Oct-2023	Female	5-10	ARI	B.D.E.1	GB5.0.5a
RSVB1-B12-08SV230012907	B	RSV-B	Human respiratory syncytial virus	Homo sapiens	United Arab Emirates	United Arab Emirates	2023-10-24	24-Oct-2023	Female	1-5	ARI	B.D.E.1	GB5.0.5a
RSVB1-B13-18SV230013204	B	RSV-B	Human respiratory syncytial virus	Homo sapiens	United Arab Emirates	United Arab Emirates	2023-10-27	27-Oct-2023	Male	1-5	ARI	B.D.E.1	GB5.0.5a
RSVB1-B14-18SV230013203	B	RSV-B	Human respiratory syncytial virus	Homo sapiens	United Arab Emirates	United Arab Emirates	2023-10-27	27-Oct-2023	Male	55	ARI	B.D.E.1	GB5.0.5a
RSVB1-B15-18SV230013211	B	RSV-B	Human respiratory syncytial virus	Homo sapiens	United Arab Emirates	United Arab Emirates	2023-10-27	27-Oct-2023	Female	18-35	ARI	B.D.E.1	GB5.0.5a
RSVB1-B16-08SV230013206	B	RSV-B	Human respiratory syncytial virus	Homo sapiens	United Arab Emirates	United Arab Emirates	2023-10-27	27-Oct-2023	Female	1-5	ARI	B.D.4.1.1	GB5.0.5a
RSVB1-B17-18SV230012710	B	RSV-B	Human respiratory syncytial virus	Homo sapiens	United Arab Emirates	United Arab Emirates	2023-10-22	22-Oct-2023	Male	1-5	ARI	B.D.E.1	GB5.0.5a
RSVB1-B18-18SV230012714	B	RSV-B	Human respiratory syncytial virus	Homo sapiens	United Arab Emirates	United Arab Emirates	2023-10-23	23-Oct-2023	Female	35-55	ARI	B.D.E.1	GB5.0.5a
RSVB1-B19-08SV230012820	B	RSV-B	Human respiratory syncytial virus	Homo sapiens	United Arab Emirates	United Arab Emirates	2023-10-23	23-Oct-2023	Male	1-5	ARI	B.D.E.1	GB5.0.5a
RSVB1-B20-02SV230013092	B	RSV-B	Human respiratory syncytial virus	Homo sapiens	United Arab Emirates	United Arab Emirates	2023-10-25	25-Oct-2023	Female	10-18	SARI	B.D.E.1	GB5.0.5a
RSVB1-B21-15SV230012919	B	RSV-B	Human respiratory syncytial virus	Homo sapiens	United Arab Emirates	United Arab Emirates	2023-10-24	24-Oct-2023	Male	10-18	ARI	B.D.4.1.1	GB5.0.5a
RSVB1-B22-18SV230012713	B	RSV-B	Human respiratory syncytial virus	Homo sapiens	United Arab Emirates	United Arab Emirates	2023-10-23	23-Oct-2023	Female	18-35	ARI	B.D.E.1	GB5.0.5a
RSVB1-B23-18SV230013145	B	RSV-B	Human respiratory syncytial virus	Homo sapiens	United Arab Emirates	United Arab Emirates	2023-10-27	27-Oct-2023	Female	10-18	ARI	B.D.4.1.1	GB5.0.5a
RSVB1-B24-08SV240000928	B	RSV-B	Human respiratory syncytial virus	Homo sapiens	United Arab Emirates	United Arab Emirates	2024-01-11	11-Jan-2024	Female	18-35	ARI	B.D.E.1	GB5.0.5a
RSVB1-B25-08SV230012930	B	RSV-B	Human respiratory syncytial virus	Homo sapiens	United Arab Emirates	United Arab Emirates	2023-10-24	24-Oct-2023	Female	0-1	ARI	B.D.E.1	GB5.0.5a
RSVB1-B26-08SV230012946	B	RSV-B	Human respiratory syncytial virus	Homo sapiens	United Arab Emirates	United Arab Emirates	2023-10-24	24-Oct-2023	Female	10-18	ARI	B.D.E.1	GB5.0.5a
RSVB1-B27-08SV230013144	B	RSV-B	Human respiratory syncytial virus	Homo sapiens	United Arab Emirates	United Arab Emirates	2023-10-26	26-Oct-2023	Male	1-5	ARI	B.D.E.1	GB5.0.5a
RSVB1-B28-08SV230013209	B	RSV-B	Human respiratory syncytial virus	Homo sapiens	United Arab Emirates	United Arab Emirates	2023-10-27	27-Oct-2023	Male	5-10	ARI	B.D.E.1	GB5.0.5a
RSVB1-B29-15SV230014219	B	RSV-B	Human respiratory syncytial virus	Homo sapiens	United Arab Emirates	United Arab Emirates	2023-11-07	07-Nov-2023	Female	35-55	ARI	B.D.E.1	GB5.0.5a
RSVB1-B31-45SV230014008	B	RSV-B	Human respiratory syncytial virus	Homo sapiens	United Arab Emirates	United Arab Emirates	2023-11-05	05-Nov-2023	Female	0-1	ARI	B.D.4.1.1	GB5.0.5a
RSVB1-B32-45SV230014181	B	RSV-B	Human respiratory syncytial virus	Homo sapiens	United Arab Emirates	United Arab Emirates	2023-11-07	07-Nov-2023	Male	10-18	ARI	B.D.E.1	GB5.0.5a
RSVB1-B34-18SV230013811	B	RSV-B	Human respiratory syncytial virus	Homo sapiens	United Arab Emirates	United Arab Emirates	2023-11-03	03-Nov-2023	Female	35-55	ARI	B.D.4.1.1	GB5.0.5a
RSVB1-B35-18SV230014525	B	RSV-B	Human respiratory syncytial virus	Homo sapiens	United Arab Emirates	United Arab Emirates	2023-11-09	09-Nov-2023	Female	5-10	ARI	B.D.E.1	GB5.0.5a
RSVB1-B36-18SV230014734	B	RSV-B	Human respiratory syncytial virus	Homo sapiens	United Arab Emirates	United Arab Emirates	2023-11-12	12-Nov-2023	Male	5-10	ARI	B.D.4.1.1	GB5.0.5a
RSVB1-B37-08SV230014474	B	RSV-B	Human respiratory syncytial virus	Homo sapiens	United Arab Emirates	United Arab Emirates	2023-11-09	09-Nov-2023	Female	0-1	ARI	B.D.E.1	GB5.0.5a
RSVB1-B38-18SV230014239	B	RSV-B	Human respiratory syncytial virus	Homo sapiens	United Arab Emirates	United Arab Emirates	2023-11-07	07-Nov-2023	Female	18-35	ARI	B.D.E.1	GB5.0.5a
RSVB1-B39-45SV230014892	B	RSV-B	Human respiratory syncytial virus	Homo sapiens	United Arab Emirates	United Arab Emirates	2023-11-13	13-Nov-2023	Female	35-55	ARI	B.D.4.1.1	GB5.0.5a
RSVB1-B40-45SV230014533	B	RSV-B	Human respiratory syncytial virus	Homo sapiens	United Arab Emirates	United Arab Emirates	2023-11-09	09-Nov-2023	Male	18-35	ARI	B.D.E.1	GB5.0.5a
RSVB1-B41-08SV230013676	B	RSV-B	Human respiratory syncytial virus	Homo sapiens	United Arab Emirates	United Arab Emirates	2023-11-01	01-Nov-2023	Male	1-5	ARI	B.D.E.1	GB5.0.5a
RSVB1-B43-15SV230013775	B	RSV-B	Human respiratory syncytial virus	Homo sapiens	United Arab Emirates	United Arab Emirates	2023-11-02	02-Nov-2023	Female	35-55	ARI	B.D.E.1	GB5.0.5a
RSVB1-B44-08SV230013713	B	RSV-B	Human respiratory syncytial virus	Homo sapiens	United Arab Emirates	United Arab Emirates	2023-11-01	01-Nov-2023	Male	10-18	ARI	B.D.E.1	GB5.0.5a
RSVB1-B45-15SV230013787	B	RSV-B	Human respiratory syncytial virus	Homo sapiens	United Arab Emirates	United Arab Emirates	2023-11-02	02-Nov-2023	Female	35-55	ARI	B.D.E.1	GB5.0.5a
RSVB1-B47-01SV230013872	B	RSV-B	Human respiratory syncytial virus	Homo sapiens	United Arab Emirates	United Arab Emirates	2023-11-03	03-Nov-2023	Male	1-5	ARI	B.D.4.1.1	GB5.0.5a
RSVB1-B48-44SV230013824	B	RSV-B	Human respiratory syncytial virus	Homo sapiens	United Arab Emirates	United Arab Emirates	2023-11-03	03-Nov-2023	Female	0-1	SARI	B.D.4.1.1	GB5.0.5a
RSVB1-B49-44SV230013967	B	RSV-B	Human respiratory syncytial virus	Homo sapiens	United Arab Emirates	United Arab Emirates	2023-11-05	05-Nov-2023	Male	1-5	SARI	B.D.E.1	GB5.0.5a
RSVB1-B50-44SV230013954	B	RSV-B	Human respiratory syncytial virus	Homo sapiens	United Arab Emirates	United Arab Emirates	2023-11-05	05-Nov-2023	Female	1-5	SARI	B.D.E.1	GB5.0.5a
RSVB1-B52-44SV230013825	B	RSV-B	Human respiratory syncytial virus	Homo sapiens	United Arab Emirates	United Arab Emirates	2023-11-03	03-Nov-2023	Female	0-1	SARI	B.D.E.1	GB5.0.5a
RSVB1-B54-01SV230015382	B	RSV-B	Human respiratory syncytial virus	Homo sapiens	United Arab Emirates	United Arab Emirates	2023-11-18	18-Nov-2023	Male	1-5	ARI	B.D.E.1	GB5.0.5a
RSVB1-B56-44SV230015251	B	RSV-B	Human respiratory syncytial virus	Homo sapiens	United Arab Emirates	United Arab Emirates	2023-11-16	16-Nov-2023	Female	0-1	SARI	B.D.4.1.1	GB5.0.5a
RSVB1-B57-01SV230015257	B	RSV-B	Human respiratory syncytial virus	Homo sapiens	United Arab Emirates	United Arab Emirates	2023-11-16	16-Nov-2023	Female	0-1	ARI	B.D.E.1	GB5.0.5a
RSVB1-B58-02SV230015308	B	RSV-B	Human respiratory syncytial virus	Homo sapiens	United Arab Emirates	United Arab Emirates	2023-11-16	16-Nov-2023	Male	5-10	SARI	B.D.E.1	GB5.0.5a
RSVB1-B59-44SV230014355	B	RSV-B	Human respiratory syncytial virus	Homo sapiens	United Arab Emirates	United Arab Emirates	2023-11-08	08-Nov-2023	Male	0-1	SARI	B.D.E.1	GB5.0.5a
RSVB1-B60-01SV230014240	B	RSV-B	Human respiratory syncytial virus	Homo sapiens	United Arab Emirates	United Arab Emirates	2023-11-07	07-Nov-2023	Male	0-1	ARI	B.D.4.1.1	GB5.0.5a
RSVB1-B61-02SV230014202	B	RSV-B	Human respiratory syncytial virus	Homo sapiens	United Arab Emirates	United Arab Emirates	2023-11-06	06-Nov-2023	Male	1-5	SARI	B.D.E.1	GB5.0.5a
RSVB1-B66-02SV230013935	B	RSV-B	Human respiratory syncytial virus	Homo sapiens	United Arab Emirates	United Arab Emirates	2023-11-04	04-Nov-2023	Female	0-1	SARI	B.D.E.1	GB5.0.5a
RSVB1-B69-44SV230016893	B	RSV-B	Human respiratory syncytial virus	Homo sapiens	United Arab Emirates	United Arab Emirates	2023-12-06	06-Dec-2023	Male	1-5	SARI	B.D.E.1	GB5.0.5a
RSVB1-B72-02SV230014397	B	RSV-B	Human respiratory syncytial virus	Homo sapiens	United Arab Emirates	United Arab Emirates	2023-11-08	08-Nov-2023	Female	1-5	SARI	B.D.E.1	GB5.0.5a
RSVB1-B73-02SV230014407	B	RSV-B	Human respiratory syncytial virus	Homo sapiens	United Arab Emirates	United Arab Emirates	2023-11-08	08-Nov-2023	Male	1-5	SARI	B.D.4.1.1	GB5.0.5a
RSVB1-B74-44SV230014319	B	RSV-B	Human respiratory syncytial virus	Homo sapiens	United Arab Emirates	United Arab Emirates	2023-11-08	08-Nov-2023	Male	1-5	SARI	B.D.E.1	GB5.0.5a
RSVB1-B75-01SV230014388	B	RSV-B	Human respiratory syncytial virus	Homo sapiens	United Arab Emirates	United Arab Emirates	2023-11-08	08-Nov-2023	Female	1-5	ARI	B.D.E.1	GB5.0.5a
RSVB1-B77-01SV230014395	B	RSV-B	Human respiratory syncytial virus	Homo sapiens	United Arab Emirates	United Arab Emirates	2023-11-08	08-Nov-2023	Female	55	ARI	B.D.E.1	GB5.0.5a
RSVB1-B78-02SV230014450	B	RSV-B	Human respiratory syncytial virus	Homo sapiens	United Arab Emirates	United Arab Emirates	2023-11-08	08-Nov-2023	Male	0-1	SARI	B.D.E.1	GB5.0.5a
RSVB1-B79-15SV230018213	B	RSV-B	Human respiratory syncytial virus	Homo sapiens	United Arab Emirates	United Arab Emirates	2023-12-24	24-Dec-2023	Male	55	ARI	B.D.4.1.1	GB5.0.5a
RSVB1-B80-02SV230017949	B	RSV-B	Human respiratory syncytial virus	Homo sapiens	United Arab Emirates	United Arab Emirates	2023-12-18	18-Dec-2023	Male	0-1	SARI	B.D.E.1	GB5.0.5a
RSVB1-B81-02SV230017940	B	RSV-B	Human respiratory syncytial virus	Homo sapiens	United Arab Emirates	United Arab Emirates	2023-12-19	19-Dec-2023	Male	0-1	SARI	B.D.E.1	GB5.0.5a
RSVB1-B82-44SV230017816	B	RSV-B	Human respiratory syncytial virus	Homo sapiens	United Arab Emirates	United Arab Emirates	2023-12-19	19-Dec-2023	Female	1-5	SARI	B.D.E.1	GB5.0.5a
RSVB1-B83-01SV230017703	B	RSV-B	Human respiratory syncytial virus	Homo sapiens	United Arab Emirates	United Arab Emirates	2023-12-17	17-Dec-2023	Male	1-5	ARI	B.D.E.1	GB5.0.5a
RSVB1-B88-44SV230016843	B	RSV-B	Human respiratory syncytial virus	Homo sapiens	United Arab Emirates	United Arab Emirates	2023-12-06	06-Dec-2023	Male	0-1	SARI	B.D.E.1	GB5.0.5a
RSVB1-B89-44SV240000005	B	RSV-B	Human respiratory syncytial virus	Homo sapiens	United Arab Emirates	United Arab Emirates	2024-01-01	01-Jan-2024	Female	1-5	SARI	B.D.4.1.1	GB5.0.5a
RSVB1-B90-44SV240004125	B	RSV-B	Human respiratory syncytial virus	Homo sapiens	United Arab Emirates	United Arab Emirates	2024-02-15	15-Feb-2024	Female	1-5	SARI	B.D.4.1.1	GB5.0.5a
RSVB1-B93-02SV230018260	B	RSV-B	Human respiratory syncytial virus	Homo sapiens	United Arab Emirates	United Arab Emirates	2023-12-24	24-Dec-2023	Male	0-1	SARI	B.D.E.1	GB5.0.5a
RSVB1-B95-44SV230018199	B	RSV-B	Human respiratory syncytial virus	Homo sapiens	United Arab Emirates	United Arab Emirates	2023-12-23	23-Dec-2023	Male	0-1	SARI	B.D.E.1	GB5.0.5a
RSVB1-B96-45SV230013744	B	RSV-B	Human respiratory syncytial virus	Homo sapiens	United Arab Emirates	United Arab Emirates	2023-11-02	02-Nov-2023	Male	18-35	ARI	B.D.4.1.1	GB5.0.5a
RSVB2-B01-02SV230014363	B	RSV-B	Human respiratory syncytial virus	Homo sapiens	United Arab Emirates	United Arab Emirates	2023-11-07	07-Nov-2023	Female	0-1	SARI	B.D.E.1	GB5.0.5a
RSVB2-B02-08SV230018322	B	RSV-B	Human respiratory syncytial virus	Homo sapiens	United Arab Emirates	United Arab Emirates	2023-12-25	25-Dec-2023	Male	18-35	ARI	B.D.E.1	GB5.0.5a
RSVB2-B03-45SV240002929	B	RSV-B	Human respiratory syncytial virus	Homo sapiens	United Arab Emirates	United Arab Emirates	2024-02-01	01-Feb-2024	Male	18-35	ARI	B.D.E.1	GB5.0.5a
RSVB2-B04-02SV240003434	B	RSV-B	Human respiratory syncytial virus	Homo sapiens	United Arab Emirates	United Arab Emirates	2024-02-06	06-Feb-2024	Male	1-5	ARI	B.D.E.1	GB5.0.5a
RSVB2-B05-45SV240003010	B	RSV-B	Human respiratory syncytial virus	Homo sapiens	United Arab Emirates	United Arab Emirates	2024-02-01	01-Feb-2024	Male	10-18	ARI	B.D.4.1.1	GB5.0.5a
RSVB2-B06-15SV24000295	B	RSV-B	Human respiratory syncytial virus	Homo sapiens	United Arab Emirates	United Arab Emirates	2024-02-01	01-Feb-2024	Male	1-5	ARI	B.D.E.1	GB5.0.5a
RSVB2-B07-44SV240002838	B	RSV-B	Human respiratory syncytial virus	Homo sapiens	United Arab Emirates	United Arab Emirates	2024-01-31	31-Jan-2024	Male	0-1	SARI	B.D.E.1	GB5.0.5a
RSVB2-B08-15SV240002788	B	RSV-B	Human respiratory syncytial virus	Homo sapiens	United Arab Emirates	United Arab Emirates	2024-01-30	30-Jan-2024	Female	35-55	ARI	B.D.4.1.1	GB5.0.5a
RSVB2-B09-44SV230013395	B	RSV-B	Human respiratory syncytial virus	Homo sapiens	United Arab Emirates	United Arab Emirates	2023-10-30	30-Oct-2023	Male	0-1	SARI	B.D.E.1	GB5.0.5a
RSVB2-B10-02SV230018351	B	RSV-B	Human respiratory syncytial virus	Homo sapiens	United Arab Emirates	United Arab Emirates	2023-12-25	25-Dec-2023	Female	0-1	SARI	B.D.E.1	GB5.0.5a
RSVB2-B11-44SV240001187	B	RSV-B	Human respiratory syncytial virus	Homo sapiens	United Arab Emirates	United Arab Emirates	2024-01-15	15-Jan-2024	Male	0-1	SARI	B.D.E.1	GB5.0.5a
RSVB2-B14-15SV240001920	B	RSV-B	Human respiratory syncytial virus	Homo sapiens	United Arab Emirates	United Arab Emirates	2024-01-22	22-Jan-2024	Male	18-35	ARI	B.D.E.1	GB5.0.5a
RSVB2-B15-45SV240002234	B	RSV-B	Human respiratory syncytial virus	Homo sapiens	United Arab Emirates	United Arab Emirates	2024-01-24	24-Jan-2024	Female	18-35	ARI	B.D.4.1.1	GB5.0.5a
RSVB2-B16-45SV240002410	B	RSV-B	Human respiratory syncytial virus	Homo sapiens	United Arab Emirates	United Arab Emirates	2024-01-25	25-Jan-2024	Female	1-5	ARI	B.D.E.1	GB5.0.5a
RSVB2-B17-02SV240002174	B	RSV-B	Human respiratory syncytial virus	Homo sapiens	United Arab Emirates	United Arab Emirates	2024-01-23	23-Jan-2024	Female	0-1	ARI	B.D.4.1.1	GB5.0.5a
RSVB2-B18-44SV240001808	B	RSV-B	Human respiratory syncytial virus	Homo sapiens	United Arab Emirates	United Arab Emirates	2024-01-20	20-Jan-2024	Male	1-5	SARI	B.D.E.1	GB5.0.5a
RSVB2-B22-44SV230013717	B	RSV-B	Human respiratory syncytial virus	Homo sapiens	United Arab Emirates	United Arab Emirates	2023-11-01	01-Nov-2023	Male	1-5	SARI	B.D.E.1	GB5.0.5a
RSVB2-B23-02SV230014348	B	RSV-B	Human respiratory syncytial virus	Homo sapiens	United Arab Emirates	United Arab Emirates	2023-11-07	07-Nov-2023	Female	1-5	SARI	B.D.E.1	GB5.0.5a
RSVB2-B25-44SV230013449	B	RSV-B	Human respiratory syncytial virus	Homo sapiens	United Arab Emirates	United Arab Emirates	2023-10-31	31-Oct-2023	Male	0-1	SARI	B.D.E.1	GB5.0.5a
RSVB2-B26-01SV230013500	B	RSV-B	Human respiratory syncytial virus	Homo sapiens	United Arab Emirates	United Arab Emirates	2023-10-31	31-Oct-2023	Female	1-5	ARI	B.D.4.1.1	GB5.0.5a
RSVB2-B27-02SV230013591	B	RSV-B	Human respiratory syncytial virus	Homo sapiens	United Arab Emirates	United Arab Emirates	2023-10-31	31-Oct-2023	Female	1-5	SARI	B.D.E.1	GB5.0.5a
RSVB2-B28-02SV230013548	B	RSV-B	Human respiratory syncytial virus	Homo sapiens	United Arab Emirates	United Arab Emirates	2023-10-31	31-Oct-2023	Female	0-1	SARI	B.D.4.1.1	GB5.0.5a
RSVB2-B29-44SV230013569	B	RSV-B	Human respiratory syncytial virus	Homo sapiens	United Arab Emirates	United Arab Emirates	2023-10-31	31-Oct-2023	Male	1-5	SARI	B.D.E.1	GB5.0.5a
RSVB2-B30-44SV230013455	B	RSV-B	Human respiratory syncytial virus	Homo sapiens	United Arab Emirates	United Arab Emirates	2023-10-31	31-Oct-2023	Male	5-10	SARI	B.D.4.1.1	GB5.0.5a
RSVB2-B31-44SV230013578	B	RSV-B	Human respiratory syncytial virus	Homo sapiens	United Arab Emirates	United Arab Emirates	2023-10-31	31-Oct-2023	Female	0-1	SARI	B.D.E.1	GB5.0.5a
RSVB2-B32-44SV230013600	B	RSV-B	Human respiratory syncytial virus	Homo sapiens	United Arab Emirates	United Arab Emirates	2023-10-31	31-Oct-2023	Female	0-1	SARI	B.D.4.1.1	GB5.0.5a
RSVB2-B33-01SV230013669	B	RSV-B	Human respiratory syncytial virus	Homo sapiens	United Arab Emirates	United Arab Emirates	2023-11-01	01-Nov-2023	Male	0-1	ARI	B.D.E.1	GB5.0.5a
RSVB2-B34-01SV230013671	B	RSV-B	Human respiratory syncytial virus	Homo sapiens	United Arab Emirates	United Arab Emirates	2023-11-01	01-Nov-2023	Female	1-5	ARI	B.D.4.1.1	GB5.0.5a
RSVB2-B35-44SV230013398	B	RSV-B	Human respiratory syncytial virus	Homo sapiens	United Arab Emirates	United Arab Emirates	2023-10-30	30-Oct-2023	Female	0-1	SARI	B.D.E.1	GB5.0.5a
RSVB2-B37-02SV230013238	B	RSV-B	Human respiratory syncytial virus	Homo sapiens	United Arab Emirates	United Arab Emirates	2023-10-27	27-Oct-2023	Female	0-1	SARI	B.D.E.1	GB5.0.5a
RSVB2-B38-02SV230013247	B	RSV-B	Human respiratory syncytial virus	Homo sapiens	United Arab Emirates	United Arab Emirates	2023-10-27	27-Oct-2023	Female	1-5	SARI	B.D.4.1.1	GB5.0.5a
RSVB2-B39-02SV230013224	B	RSV-B	Human respiratory syncytial virus	Homo sapiens	United Arab Emirates	United Arab Emirates	2023-10-27	27-Oct-2023	Female	0-1	SARI	B.D.E.1	GB5.0.5a
RSVB2-B41-08SV230013064	B	RSV-B	Human respiratory syncytial virus	Homo sapiens	United Arab Emirates	United Arab Emirates	2023-10-25	25-Oct-2023	Female	0-1	ARI	B.D.4.1.1	GB5.0.5a
RSVB2-B42-02SV230013448	B	RSV-B	Human respiratory syncytial virus	Homo sapiens	United Arab Emirates	United Arab Emirates	2023-10-30	30-Oct-2023	Male	0-1	SARI	B.D.E.1	GB5.0.5a
RSVB2-B43-08SV230013072	B	RSV-B	Human respiratory syncytial virus	Homo sapiens	United Arab Emirates	United Arab Emirates	2023-10-25	25-Oct-2023	Female	1-5	ARI	B.D.4.1.1	GB5.0.5a
RSVB2-B44-08SV230013131	B	RSV-B	Human respiratory syncytial virus	Homo sapiens	United Arab Emirates	United Arab Emirates	2023-10-26	26-Oct-2023	Male	5-10	ARI	B.D.E.1	GB5.0.5a
RSVB2-B45-44SV230013266	B	RSV-B	Human respiratory syncytial virus	Homo sapiens	United Arab Emirates	United Arab Emirates	2023-10-28	28-Oct-2023	Male	1-5	SARI	B.D.E.1	GB5.0.5a
RSVB2-B46-44SV230013304	B	RSV-B	Human respiratory syncytial virus	Homo sapiens	United Arab Emirates	United Arab Emirates	2023-10-29	29-Oct-2023	Female	1-5	SARI	B.D.E.1	GB5.0.5a
RSVB2-B48-01SV230013253	B	RSV-B	Human respiratory syncytial virus	Homo sapiens	United Arab Emirates	United Arab Emirates	2023-10-28	28-Oct-2023	Male	0-1	ARI	B.D.4.1.1	GB5.0.5a
RSVB2-B49-44SV230013298	B	RSV-B	Human respiratory syncytial virus	Homo sapiens	United Arab Emirates	United Arab Emirates	2023-10-29	29-Oct-2023	Female	1-5	SARI	B.D.E.1	GB5.0.5a
RSVB2-B50-44SV230013228	B	RSV-B	Human respiratory syncytial virus	Homo sapiens	United Arab Emirates	United Arab Emirates	2023-10-27	27-Oct-2023	Female	1-5	SARI	B.D.E.1	GB5.0.5a
RSVB2-B51-44SV230013160	B	RSV-B	Human respiratory syncytial virus	Homo sapiens	United Arab Emirates	United Arab Emirates	2023-10-27	27-Oct-2023	Female	1-5	SARI	B.D.4.1.1	GB5.0.5a
RSVB2-B52-44SV230013346	B	RSV-B	Human respiratory syncytial virus	Homo sapiens	United Arab Emirates	United Arab Emirates	2023-10-29	29-Oct-2023	Male	0-1	SARI	B.D.E.1	GB5.0.5a
RSVB2-B53-44SV230013249	B	RSV-B	Human respiratory syncytial virus	Homo sapiens	United Arab Emirates	United Arab Emirates	2023-10-28	28-Oct-2023	Male	0-1	SARI	B.D.E.1	GB5.0.5a
RSVB2-B54-44SV230013341	B	RSV-B	Human respiratory syncytial virus	Homo sapiens	United Arab Emirates	United Arab Emirates	2023-10-29	29-Oct-2023	Female	0-1	SARI	B.D.E.1	GB5.0.5a
RSVB2-B55-44SV230013152	B	RSV-B	Human respiratory syncytial virus	Homo sapiens	United Arab Emirates	United Arab Emirates	2023-10-27	27-Oct-2023	Male	0-1	SARI	B.D.E.1	GB5.0.5a
RSVB2-B56-01SV230013251	B	RSV-B	Human respiratory syncytial virus	Homo sapiens	United Arab Emirates	United Arab Emirates	2023-10-28	28-Oct-2023	Male	0-1	SARI	B.D.4.1.1	GB5.0.5a
RSVB2-B57-44SV230018641	B	RSV-B	Human respiratory syncytial virus	Homo sapiens	United Arab Emirates	United Arab Emirates	2023-12-29	29-Dec-2023	Male	0-1	SARI	B.D.E.1	GB5.0.5a
RSVB2-B58-44SV230018684	B	RSV-B	Human respiratory syncytial virus	Homo sapiens	United Arab Emirates	United Arab Emirates	2023-12-30	30-Dec-2023	Female	1-5	SARI	B.D.E.1	GB5.0.5a
RSVB2-B59-44SV230018694	B	RSV-B	Human respiratory syncytial virus	Homo sapiens	United Arab Emirates	United Arab Emirates	2023-12-30	30-Dec-2023	Female	1-5	SARI	B.D.E.1	GB5.0.5a
RSVB2-B60-45SV240000099	B	RSV-B	Human respiratory syncytial virus	Homo sapiens	United Arab Emirates	United Arab Emirates	2024-01-02	02-Jan-2024	Male	18-35	ARI	B.D.E.1	GB5.0.5a
RSVB2-B61-02SV230018763	B	RSV-B	Human respiratory syncytial virus	Homo sapiens	United Arab Emirates	United Arab Emirates	2023-12-30	30-Dec-2023	Female	0-1	ARI	B.D.E.1	GB5.0.5a
RSVB2-B62-45SV240000265	B	RSV-B	Human respiratory syncytial virus	Homo sapiens	United Arab Emirates	United Arab Emirates	2024-01-04	04-Jan-2024	Female	35-55	ARI	B.D.E.1	GB5.0.5a
RSVB2-B64-44SV240003517	B	RSV-B	Human respiratory syncytial virus	Homo sapiens	United Arab Emirates	United Arab Emirates	2024-02-07	07-Feb-2024	Female	55	SARI	B.D.E.1	GB5.0.5a
RSVB3-B02-08SV230016556	B	RSV-B	Human respiratory syncytial virus	Homo sapiens	United Arab Emirates	United Arab Emirates	2023-12-01	01-Dec-2023	Male	1-5	ARI	B.D.4.1.1	GB5.0.5a
RSVB3-B03-08SV230016524	B	RSV-B	Human respiratory syncytial virus	Homo sapiens	United Arab Emirates	United Arab Emirates	2023-12-01	01-Dec-2023	Male	10-18	ARI	B.D.E.1	GB5.0.5a
RSVB3-B04-02SV230011888	B	RSV-B	Human respiratory syncytial virus	Homo sapiens	United Arab Emirates	United Arab Emirates	2023-10-10	10-Oct-2023	Male	0-1	SARI	B.D.4.1.1	GB5.0.5a
RSVB3-B05-01SV230011518	B	RSV-B	Human respiratory syncytial virus	Homo sapiens	United Arab Emirates	United Arab Emirates	2023-10-06	06-Oct-2023	Female	0-1	SARI	B.D.E.1	GB5.0.5a
RSVB3-B07-44SV230011727	B	RSV-B	Human respiratory syncytial virus	Homo sapiens	United Arab Emirates	United Arab Emirates	2023-10-10	10-Oct-2023	Female	0-1	SARI	B.D.4.1.1	GB5.0.5a
RSVB3-B09-18SV230011835	B	RSV-B	Human respiratory syncytial virus	Homo sapiens	United Arab Emirates	United Arab Emirates	2023-10-11	11-Oct-2023	Male	10-18	ARI	B.D.4.1.1	GB5.0.5a
RSVB3-B11-08SV230015261	B	RSV-B	Human respiratory syncytial virus	Homo sapiens	United Arab Emirates	United Arab Emirates	2023-11-16	16-Nov-2023	Female	1-5	ARI	B.D.E.1	GB5.0.5a
RSVB3-B12-45SV230017441	B	RSV-B	Human respiratory syncytial virus	Homo sapiens	United Arab Emirates	United Arab Emirates	2023-12-13	13-Dec-2023	Male	18-35	ARI	B.D.E.1	GB5.0.5a
RSVB3-B13-18SV230011840	B	RSV-B	Human respiratory syncytial virus	Homo sapiens	United Arab Emirates	United Arab Emirates	2023-10-11	11-Oct-2023	Female	18-35	ARI	B.D.4.1.1	GB5.0.5a
RSVB3-B15-45SV230016561	B	RSV-B	Human respiratory syncytial virus	Homo sapiens	United Arab Emirates	United Arab Emirates	2023-12-01	01-Dec-2023	Female	55	ARI	B.D.E.1	GB5.0.5a
RSVB3-B16-18SV230016511	B	RSV-B	Human respiratory syncytial virus	Homo sapiens	United Arab Emirates	United Arab Emirates	2023-11-30	30-Nov-2023	Female	18-35	ARI	B.D.E.1	GB5.0.5a
RSVB3-B17-15SV230016941	B	RSV-B	Human respiratory syncytial virus	Homo sapiens	United Arab Emirates	United Arab Emirates	2023-12-07	07-Dec-2023	Male	18-35	ARI	B.D.4.1.1	GB5.0.5a
RSVB3-B18-02SV230012063	B	RSV-B	Human respiratory syncytial virus	Homo sapiens	United Arab Emirates	United Arab Emirates	2023-10-13	13-Oct-2023	Female	1-5	SARI	B.D.E.1	GB5.0.5a
RSVB3-B19-44SV230011798	B	RSV-B	Human respiratory syncytial virus	Homo sapiens	United Arab Emirates	United Arab Emirates	2023-10-10	10-Oct-2023	Male	55	SARI	B.D.E.1	GB5.0.5a
RSVB3-B20-44SV230011761	B	RSV-B	Human respiratory syncytial virus	Homo sapiens	United Arab Emirates	United Arab Emirates	2023-10-10	10-Oct-2023	Male	1-5	SARI	B.D.4.1.1	GB5.0.5a
RSVB3-B22-08SV230016954	B	RSV-B	Human respiratory syncytial virus	Homo sapiens	United Arab Emirates	United Arab Emirates	2023-12-07	07-Dec-2023	Female	5-10	ARI	B.D.4.1.1	GB5.0.5a
RSVB3-B23-18SV230016992	B	RSV-B	Human respiratory syncytial virus	Homo sapiens	United Arab Emirates	United Arab Emirates	2023-12-07	07-Dec-2023	Female	1-5	ARI	B.D.4.1.1	GB5.0.5a
RSVB3-B24-44SV230015873	B	RSV-B	Human respiratory syncytial virus	Homo sapiens	United Arab Emirates	United Arab Emirates	2023-11-23	23-Nov-2023	Male	0-1	SARI	B.D.E.1	GB5.0.5a
RSVB3-B25-01SV230011850	B	RSV-B	Human respiratory syncytial virus	Homo sapiens	United Arab Emirates	United Arab Emirates	2023-10-11	11-Oct-2023	Male	1-5	SARI	B.D.E.1	GB5.0.5a
RSVB3-B26-18SV230011862	B	RSV-B	Human respiratory syncytial virus	Homo sapiens	United Arab Emirates	United Arab Emirates	2023-10-11	11-Oct-2023	Male	10-18	ARI	B.D.E.1	GB5.0.5a
RSVB3-B27-44SV230011912	B	RSV-B	Human respiratory syncytial virus	Homo sapiens	United Arab Emirates	United Arab Emirates	2023-10-12	12-Oct-2023	Male	0-1	SARI	B.D.4.1.1	GB5.0.5a
RSVB3-B28-15SV230011861	B	RSV-B	Human respiratory syncytial virus	Homo sapiens	United Arab Emirates	United Arab Emirates	2023-10-11	11-Oct-2023	Female	10-18	ARI	B.D.E.1	GB5.0.5a
RSVB3-B29-44SV230011833	B	RSV-B	Human respiratory syncytial virus	Homo sapiens	United Arab Emirates	United Arab Emirates	2023-10-11	11-Oct-2023	Male	0-1	SARI	B.D.E.1	GB5.0.5a
RSVB3-B30-08SV230011864	B	RSV-B	Human respiratory syncytial virus	Homo sapiens	United Arab Emirates	United Arab Emirates	2023-10-11	11-Oct-2023	Male	5-10	ARI	B.D.E.1	GB5.0.5a
RSVB3-B31-18SV230011800	B	RSV-B	Human respiratory syncytial virus	Homo sapiens	United Arab Emirates	United Arab Emirates	2023-10-10	10-Oct-2023	Male	0-1	ARI	B.D.E.1	GB5.0.5a
RSVB3-B32-44SV230011909	B	RSV-B	Human respiratory syncytial virus	Homo sapiens	United Arab Emirates	United Arab Emirates	2023-10-11	11-Oct-2023	Female	0-1	SARI	B.D.E.1	GB5.0.5a
RSVB3-B33-44SV230011571	B	RSV-B	Human respiratory syncytial virus	Homo sapiens	United Arab Emirates	United Arab Emirates	2023-10-07	07-Oct-2023	Female	0-1	SARI	B.D.E.1	GB5.0.5a
RSVB3-B35-02SV230011648	B	RSV-B	Human respiratory syncytial virus	Homo sapiens	United Arab Emirates	United Arab Emirates	2023-10-08	08-Oct-2023	Female	1-5	SARI	B.D.E.1	GB5.0.5a
RSVB3-B36-44SV230011576	B	RSV-B	Human respiratory syncytial virus	Homo sapiens	United Arab Emirates	United Arab Emirates	2023-10-07	07-Oct-2023	Male	0-1	SARI	B.D.E.1	GB5.0.5a
RSVB3-B37-44SV230011548	B	RSV-B	Human respiratory syncytial virus	Homo sapiens	United Arab Emirates	United Arab Emirates	2023-10-07	07-Oct-2023	Male	1-5	SARI	B.D.4.1.1	GB5.0.5a
RSVB3-B38-02SV230011642	B	RSV-B	Human respiratory syncytial virus	Homo sapiens	United Arab Emirates	United Arab Emirates	2023-10-08	08-Oct-2023	Male	1-5	SARI	B.D.E.1	GB5.0.5a
RSVB3-B39-01SV230011848	B	RSV-B	Human respiratory syncytial virus	Homo sapiens	United Arab Emirates	United Arab Emirates	2023-10-11	11-Oct-2023	Female	0-1	SARI	B.D.E.1	GB5.0.5a
RSVB3-B40-44SV230011584	B	RSV-B	Human respiratory syncytial virus	Homo sapiens	United Arab Emirates	United Arab Emirates	2023-10-08	08-Oct-2023	Female	1-5	SARI	B.D.E.1	GB5.0.5a
RSVB3-B41-02SV230011723	B	RSV-B	Human respiratory syncytial virus	Homo sapiens	United Arab Emirates	United Arab Emirates	2023-10-07	07-Oct-2023	Male	1-5	SARI	B.D.E.1	GB5.0.5a
RSVB3-B42-18SV230011801	B	RSV-B	Human respiratory syncytial virus	Homo sapiens	United Arab Emirates	United Arab Emirates	2023-10-10	10-Oct-2023	Female	10-18	ARI	B.D.E.1	GB5.0.5a
RSVB3-B43-02SV230003417	B	RSV-B	Human respiratory syncytial virus	Homo sapiens	United Arab Emirates	United Arab Emirates	2023-03-20	20-Mar-2023	Male	0-1	SARI	B.D.4.1.1	GB5.0.5a
RSVB3-B44-44SV230006011	B	RSV-B	Human respiratory syncytial virus	Homo sapiens	United Arab Emirates	United Arab Emirates	2023-05-20	20-May-2023	Male	1-5	SARI	B.D.E.1	GB5.0.5a
RSVB3-B45-02SV230011343	B	RSV-B	Human respiratory syncytial virus	Homo sapiens	United Arab Emirates	United Arab Emirates	2023-09-30	30-Sep-2023	Male	0-1	ARI	B.D.E.1	GB5.0.5a
RSVB3-B46-01SV230011702	B	RSV-B	Human respiratory syncytial virus	Homo sapiens	United Arab Emirates	United Arab Emirates	2023-10-09	09-Oct-2023	Male	0-1	SARI	B.D.4.1.1	GB5.0.5a
RSVB3-B48-01SV230012240	B	RSV-B	Human respiratory syncytial virus	Homo sapiens	United Arab Emirates	United Arab Emirates	2023-10-16	16-Oct-2023	Male	0-1	SARI	B.D.E.1	GB5.0.5a
RSVB3-B49-44SV230011664	B	RSV-B	Human respiratory syncytial virus	Homo sapiens	United Arab Emirates	United Arab Emirates	2023-10-09	09-Oct-2023	Male	1-5	SARI	B.D.E.1	GB5.0.5a
RSVB3-B51-44SV230016516	B	RSV-B	Human respiratory syncytial virus	Homo sapiens	United Arab Emirates	United Arab Emirates	2023-12-01	01-Dec-2023	Female	0-1	SARI	B.D.4.1.1	GB5.0.5a
RSVB3-B53-02SV230012157	B	RSV-B	Human respiratory syncytial virus	Homo sapiens	United Arab Emirates	United Arab Emirates	2023-10-15	15-Oct-2023	Male	1-5	SARI	B.D.E.1	GB5.0.5a
RSVB3-B57-44SV230016357	B	RSV-B	Human respiratory syncytial virus	Homo sapiens	United Arab Emirates	United Arab Emirates	2023-11-29	29-Nov-2023	Female	0-1	SARI	B.D.E.1	GB5.0.5a
RSVB3-B58-44SV230016220	B	RSV-B	Human respiratory syncytial virus	Homo sapiens	United Arab Emirates	United Arab Emirates	2023-11-28	28-Nov-2023	Female	0-1	SARI	B.D.E.1	GB5.0.5a
RSVB3-B59-02SV230015602	B	RSV-B	Human respiratory syncytial virus	Homo sapiens	United Arab Emirates	United Arab Emirates	2023-11-21	21-Nov-2023	Female	0-1	SARI	B.D.E.1	GB5.0.5a
RSVB3-B60-02SV230015519	B	RSV-B	Human respiratory syncytial virus	Homo sapiens	United Arab Emirates	United Arab Emirates	2023-11-19	19-Nov-2023	Male	1-5	SARI	B.D.E.1	GB5.0.5a
RSVB3-B61-02SV230016557	B	RSV-B	Human respiratory syncytial virus	Homo sapiens	United Arab Emirates	United Arab Emirates	2023-12-01	01-Dec-2023	Male	5-10	SARI	B.D.E.1	GB5.0.5a
RSVB3-B63-02SV230015729	B	RSV-B	Human respiratory syncytial virus	Homo sapiens	United Arab Emirates	United Arab Emirates	2023-11-21	21-Nov-2023	Female	18-35	SARI	B.D.4.1.1	GB5.0.5a
RSVB3-B64-44SV230015601	B	RSV-B	Human respiratory syncytial virus	Homo sapiens	United Arab Emirates	United Arab Emirates	2023-11-21	21-Nov-2023	Male	0-1	SARI	B.D.E.1	GB5.0.5a
RSVB3-B65-02SV230017193	B	RSV-B	Human respiratory syncytial virus	Homo sapiens	United Arab Emirates	United Arab Emirates	2023-12-10	10-Dec-2023	Female	1-5	SARI	B.D.E.1	GB5.0.5a
RSVB3-B66-01SV230017163	B	RSV-B	Human respiratory syncytial virus	Homo sapiens	United Arab Emirates	United Arab Emirates	2023-12-10	10-Dec-2023	Male	1-5	ARI	B.D.E.1	GB5.0.5a
RSVB3-B67-44SV230017189	B	RSV-B	Human respiratory syncytial virus	Homo sapiens	United Arab Emirates	United Arab Emirates	2023-12-11	11-Dec-2023	Female	0-1	SARI	B.D.E.1	GB5.0.5a
RSVB3-B68-44SV230017129	B	RSV-B	Human respiratory syncytial virus	Homo sapiens	United Arab Emirates	United Arab Emirates	2023-12-09	09-Dec-2023	Female	0-1	SARI	B.D.E.1	GB5.0.5a
RSVB3-B69-44SV230015486	B	RSV-B	Human respiratory syncytial virus	Homo sapiens	United Arab Emirates	United Arab Emirates	2023-11-20	20-Nov-2023	Male	0-1	SARI	B.D.E.1	GB5.0.5a
RSVB3-B71-18SV230017486	B	RSV-B	Human respiratory syncytial virus	Homo sapiens	United Arab Emirates	United Arab Emirates	2023-12-14	14-Dec-2023	Male	18-35	ARI	B.D.E.1	GB5.0.5a
RSVB3-B72-44SV230015758	B	RSV-B	Human respiratory syncytial virus	Homo sapiens	United Arab Emirates	United Arab Emirates	2023-11-23	23-Nov-2023	Female	0-1	SARI	B.D.E.1	GB5.0.5a
RSVB3-B73-44SV230015600	B	RSV-B	Human respiratory syncytial virus	Homo sapiens	United Arab Emirates	United Arab Emirates	2023-11-21	21-Nov-2023	Female	1-5	SARI	B.D.E.1	GB5.0.5a
RSVB3-B74-44SV230015604	B	RSV-B	Human respiratory syncytial virus	Homo sapiens	United Arab Emirates	United Arab Emirates	2023-11-21	21-Nov-2023	Male	1-5	SARI	B.D.E.1	GB5.0.5a
RSVB3-B75-44SV230017512	B	RSV-B	Human respiratory syncytial virus	Homo sapiens	United Arab Emirates	United Arab Emirates	2023-12-14	14-Dec-2023	Male	1-5	SARI	B.D.E.1	GB5.0.5a
RSVB3-B76-02SV230011745	B	RSV-B	Human respiratory syncytial virus	Homo sapiens	United Arab Emirates	United Arab Emirates	2023-10-05	05-Oct-2023	Female	0-1	ARI	B.D.E.1	GB5.0.5a
RSVB3-B77-44SV230012206	B	RSV-B	Human respiratory syncytial virus	Homo sapiens	United Arab Emirates	United Arab Emirates	2023-10-16	16-Oct-2023	Male	1-5	SARI	B.D.4.1.1	GB5.0.5a
RSVB3-B79-01SV230011700	B	RSV-B	Human respiratory syncytial virus	Homo sapiens	United Arab Emirates	United Arab Emirates	2023-10-09	09-Oct-2023	Male	0-1	SARI	B.D.E.1	GB5.0.5a
RSVB3-B80-15SV230011528	B	RSV-B	Human respiratory syncytial virus	Homo sapiens	United Arab Emirates	United Arab Emirates	2023-10-06	06-Oct-2023	Female	55	ARI	B.D.E.1	GB5.0.5a
RSVB3-B81-44SV230016039	B	RSV-B	Human respiratory syncytial virus	Homo sapiens	United Arab Emirates	United Arab Emirates	2023-11-25	25-Nov-2023	Male	0-1	SARI	B.D.E.1	GB5.0.5a
RSVB3-B82-44SV230016110	B	RSV-B	Human respiratory syncytial virus	Homo sapiens	United Arab Emirates	United Arab Emirates	2023-11-26	26-Nov-2023	Male	0-1	SARI	B.D.E.1	GB5.0.5a
RSVB3-B83-44SV230016040	B	RSV-B	Human respiratory syncytial virus	Homo sapiens	United Arab Emirates	United Arab Emirates	2023-11-25	25-Nov-2023	Male	1-5	SARI	B.D.E.1	GB5.0.5a
RSVB3-B84-44SV230015947	B	RSV-B	Human respiratory syncytial virus	Homo sapiens	United Arab Emirates	United Arab Emirates	2023-11-24	24-Nov-2023	Male	0-1	SARI	B.D.E.1	GB5.0.5a
RSVB3-B85-01SV230012244	B	RSV-B	Human respiratory syncytial virus	Homo sapiens	United Arab Emirates	United Arab Emirates	2023-10-16	16-Oct-2023	Female	0-1	SARI	B.D.E.1	GB5.0.5a
RSVB3-B86-44SV230012237	B	RSV-B	Human respiratory syncytial virus	Homo sapiens	United Arab Emirates	United Arab Emirates	2023-10-16	16-Oct-2023	Female	0-1	SARI	B.D.E.1	GB5.0.5a
RSVB3-B87-01SV230012243	B	RSV-B	Human respiratory syncytial virus	Homo sapiens	United Arab Emirates	United Arab Emirates	2023-10-16	16-Oct-2023	Male	0-1	SARI	B.D.4.1.1	GB5.0.5a
RSVB3-B89-01SV230011520	B	RSV-B	Human respiratory syncytial virus	Homo sapiens	United Arab Emirates	United Arab Emirates	2023-10-06	06-Oct-2023	Male	0-1	SARI	B.D.4.1.1	GB5.0.5a
RSVB3-B90-44SV230011725	B	RSV-B	Human respiratory syncytial virus	Homo sapiens	United Arab Emirates	United Arab Emirates	2023-10-10	10-Oct-2023	Female	5-10	SARI	B.D.E.1	GB5.0.5a
RSVB3-B91-01SV230017540	B	RSV-B	Human respiratory syncytial virus	Homo sapiens	United Arab Emirates	United Arab Emirates	2023-12-14	14-Dec-2023	Male	0-1	ARI	B.D.4.1.1	GB5.0.5a
RSVB3-B92-01SV230017539	B	RSV-B	Human respiratory syncytial virus	Homo sapiens	United Arab Emirates	United Arab Emirates	2023-12-14	14-Dec-2023	Male	1-5	ARI	B.D.4.1.1	GB5.0.5a
RSVB3-B93-02SV230012189	B	RSV-B	Human respiratory syncytial virus	Homo sapiens	United Arab Emirates	United Arab Emirates	2023-10-15	15-Oct-2023	Female	0-1	SARI	B.D.E.1	GB5.0.5a
RSVB3-B94-01SV230011809	B	RSV-B	Human respiratory syncytial virus	Homo sapiens	United Arab Emirates	United Arab Emirates	2023-10-10	10-Oct-2023	Female	1-5	SARI	B.D.E.1	GB5.0.5a
RSVB3-B95-44SV230011669	B	RSV-B	Human respiratory syncytial virus	Homo sapiens	United Arab Emirates	United Arab Emirates	2023-10-09	09-Oct-2023	Female	0-1	SARI	B.D.E.1	GB5.0.5a
RSVB3-B96-44SV230011659	B	RSV-B	Human respiratory syncytial virus	Homo sapiens	United Arab Emirates	United Arab Emirates	2023-10-09	09-Oct-2023	Male	0-1	SARI	B.D.E.1	GB5.0.5a
RSVB4-B02-08SV230008286	B	RSV-B	Human respiratory syncytial virus	Homo sapiens	United Arab Emirates	United Arab Emirates	2023-07-26	26-Jul-2023	Male	5-10	ARI	B.D.4.1.1	GB5.0.5a
RSVB4-B03-01SV230001962	B	RSV-B	Human respiratory syncytial virus	Homo sapiens	United Arab Emirates	United Arab Emirates	2023-02-19	19-Feb-2023	Male	1-5	SARI	B.D.E.1	GB5.0.5a
RSVB4-B04-44SV230007231	B	RSV-B	Human respiratory syncytial virus	Homo sapiens	United Arab Emirates	United Arab Emirates	2023-06-21	21-Jun-2023	Male	1-5	SARI	B.D.E.1	GB5.0.5a
RSVB4-B05-45SV230004616	B	RSV-B	Human respiratory syncytial virus	Homo sapiens	United Arab Emirates	United Arab Emirates	2023-04-19	19-Apr-2023	Male	55	ARI	B.D.4.1.1	GB5.0.5a
RSVB4-B06-02SV230001274	B	RSV-B	Human respiratory syncytial virus	Homo sapiens	United Arab Emirates	United Arab Emirates	2023-02-05	05-Feb-2023	Female	1-5	SARI	B.D.4.1.1	GB5.0.5a
RSVB4-B08-02SV230000630	B	RSV-B	Human respiratory syncytial virus	Homo sapiens	United Arab Emirates	United Arab Emirates	2023-01-18	18-Jan-2023	Male	1-5	SARI	B.D.4.1.1	GB5.0.5a
RSVB4-B10-08SV230002837	B	RSV-B	Human respiratory syncytial virus	Homo sapiens	United Arab Emirates	United Arab Emirates	2023-03-09	09-Mar-2023	Female	1-5	ARI	B.D.E.1	GB5.0.5a
RSVB4-B11-44SV230007179	B	RSV-B	Human respiratory syncytial virus	Homo sapiens	United Arab Emirates	United Arab Emirates	2023-06-20	20-Jun-2023	Female	1-5	SARI	B.D.E.1	GB5.0.5a
RSVB4-B12-15SV230001177	B	RSV-B	Human respiratory syncytial virus	Homo sapiens	United Arab Emirates	United Arab Emirates	2023-02-02	02-Feb-2023	Male	18-35	ARI	B.D.E.1	GB5.0.5a
RSVB4-B13-02SV230002742	B	RSV-B	Human respiratory syncytial virus	Homo sapiens	United Arab Emirates	United Arab Emirates	2023-03-07	07-Mar-2023	Male	0-1	SARI	B.D.4.1.1	GB5.0.5a
RSVB4-B14-02SV230001263	B	RSV-B	Human respiratory syncytial virus	Homo sapiens	United Arab Emirates	United Arab Emirates	2023-02-04	04-Feb-2023	Male	0-1	SARI	B.D.E.1	GB5.0.5a
RSVB4-B15-45SV230003547	B	RSV-B	Human respiratory syncytial virus	Homo sapiens	United Arab Emirates	United Arab Emirates	2023-03-03	03-Mar-2023	Male	5-10	ARI	B.D.4.1.1	GB5.0.5a
RSVB4-B16-44SV230008035	B	RSV-B	Human respiratory syncytial virus	Homo sapiens	United Arab Emirates	United Arab Emirates	2023-07-15	15-Jul-2023	Male	0-1	SARI	B.D.E.1	GB5.0.5a
RSVB4-B17-44SV230004480	B	RSV-B	Human respiratory syncytial virus	Homo sapiens	United Arab Emirates	United Arab Emirates	2023-04-16	16-Apr-2023	Male	1-5	SARI	B.D.4.1.1	GB5.0.5a
RSVB4-B18-15SV230003317	B	RSV-B	Human respiratory syncytial virus	Homo sapiens	United Arab Emirates	United Arab Emirates	2023-03-19	19-Mar-2023	Female	55	ARI	B.D.E.1	GB5.0.5a
RSVB4-B19-45SV230008169	B	RSV-B	Human respiratory syncytial virus	Homo sapiens	United Arab Emirates	United Arab Emirates	2023-07-20	20-Jul-2023	Female	0-1	ARI	B.D.E.1	GB5.0.5a
RSVB4-B21-02SV230002806	B	RSV-B	Human respiratory syncytial virus	Homo sapiens	United Arab Emirates	United Arab Emirates	2023-03-08	08-Mar-2023	Female	0-1	SARI	B.D.4.1.1	GB5.0.5a
RSVB4-B22-08SV230005810	B	RSV-B	Human respiratory syncytial virus	Homo sapiens	United Arab Emirates	United Arab Emirates	2023-05-16	16-May-2023	Female	1-5	ARI	B.D.E.1	GB5.0.5a
RSVB4-B23-02SV230001274	B	RSV-B	Human respiratory syncytial virus	Homo sapiens	United Arab Emirates	United Arab Emirates
RSVB4-B24-02SV230001932	B	RSV-B	Human respiratory syncytial virus	Homo sapiens	United Arab Emirates	United Arab Emirates	2023-02-17	17-Feb-2023	Female	1-5	SARI	B.D.4.1.1	GB5.0.5a
RSVB4-B25-15SV230000356	B	RSV-B	Human respiratory syncytial virus	Homo sapiens	United Arab Emirates	United Arab Emirates	2023-01-11	11-Jan-2023	Female	55	ARI	B.D.E.1	GB5.0.5a
RSVB4-B28-45SV230007882	B	RSV-B	Human respiratory syncytial virus	Homo sapiens	United Arab Emirates	United Arab Emirates	2023-07-10	10-Jul-2023	Female	18-35	ARI	B.D.4.1.1	GB5.0.5a
RSVB4-B29-44SV230006158	B	RSV-B	Human respiratory syncytial virus	Homo sapiens	United Arab Emirates	United Arab Emirates	2023-05-24	24-May-2023	Female	1-5	SARI	B.D.E.1	GB5.0.5a
RSVB4-B30-02SV230002488	B	RSV-B	Human respiratory syncytial virus	Homo sapiens	United Arab Emirates	United Arab Emirates	2023-02-21	21-Feb-2023	Female	1-5	ARI	B.D.4.1.1	GB5.0.5a
RSVB4-B31-15SV230008021	B	RSV-B	Human respiratory syncytial virus	Homo sapiens	United Arab Emirates	United Arab Emirates	2023-07-14	14-Jul-2023	Female	18-35	ARI	B.D.E.1	GB5.0.5a
RSVB4-B32-44SV230006565	B	RSV-B	Human respiratory syncytial virus	Homo sapiens	United Arab Emirates	United Arab Emirates	2023-06-03	03-Jun-2023	Male	1-5	SARI	B.D.4.1.1	GB5.0.5a
RSVB4-B34-08SV230008287	B	RSV-B	Human respiratory syncytial virus	Homo sapiens	United Arab Emirates	United Arab Emirates	2023-07-26	26-Jul-2023	Female	1-5	ARI	B.D.4.1.1	GB5.0.5a
RSVB4-B35-08SV230001144	B	RSV-B	Human respiratory syncytial virus	Homo sapiens	United Arab Emirates	United Arab Emirates	2023-02-02	02-Feb-2023	Female	55	ARI	B.D.E.1	GB5.0.5a
RSVB4-B36-08SV230008288	B	RSV-B	Human respiratory syncytial virus	Homo sapiens	United Arab Emirates	United Arab Emirates	2023-07-26	26-Jul-2023	Male	1-5	ARI	B.D.4.1.1	GB5.0.5a
RSVB4-B37-02SV230003274	B	RSV-B	Human respiratory syncytial virus	Homo sapiens	United Arab Emirates	United Arab Emirates	2023-03-17	17-Mar-2023	Female	1-5	SARI	B.D.4.1.1	GB5.0.5a
RSVB4-B38-44SV230004496	B	RSV-B	Human respiratory syncytial virus	Homo sapiens	United Arab Emirates	United Arab Emirates	2023-04-17	17-Apr-2023	Female	1-5	SARI	B.D.4.1.1	GB5.0.5a
RSVB4-B39-08SV230006112	B	RSV-B	Human respiratory syncytial virus	Homo sapiens	United Arab Emirates	United Arab Emirates	2023-05-23	23-May-2023	Male	1-5	ARI	B.D.E.1	GB5.0.5a
RSVB4-B40-44SV230007787	B	RSV-B	Human respiratory syncytial virus	Homo sapiens	United Arab Emirates	United Arab Emirates	2023-07-07	07-Jul-2023	Male	0-1	SARI	B.D.E.1	GB5.0.5a
RSVB4-B41-08SV230005946	B	RSV-B	Human respiratory syncytial virus	Homo sapiens	United Arab Emirates	United Arab Emirates	2023-05-18	18-May-2023	Female	35-55	ARI	B.D.E.1	GB5.0.5a
RSVB4-B42-15SV230001452	B	RSV-B	Human respiratory syncytial virus	Homo sapiens	United Arab Emirates	United Arab Emirates	2023-02-08	08-Feb-2023	Female	55	ARI	B.D.E.1	GB5.0.5a
RSVB4-B43-02SV230001713	B	RSV-B	Human respiratory syncytial virus	Homo sapiens	United Arab Emirates	United Arab Emirates	2023-02-13	13-Feb-2023	Male	5-10	SARI	B.D.E.1	GB5.0.5a
RSVB4-B44-44SV230007452	B	RSV-B	Human respiratory syncytial virus	Homo sapiens	United Arab Emirates	United Arab Emirates	2023-06-26	26-Jun-2023	Female	0-1	SARI	B.D.E.1	GB5.0.5a
RSVB4-B46-02SV230011099	B	RSV-B	Human respiratory syncytial virus	Homo sapiens	United Arab Emirates	United Arab Emirates	2023-10-01	01-Oct-2023	Male	1-5	SARI	B.D.4.1.1	GB5.0.5a
RSVB4-B47-02SV230011038	B	RSV-B	Human respiratory syncytial virus	Homo sapiens	United Arab Emirates	United Arab Emirates	2023-09-29	29-Sep-2023	Female	1-5	SARI	B.D.E.1	GB5.0.5a
RSVB4-B48-02SV230011005	B	RSV-B	Human respiratory syncytial virus	Homo sapiens	United Arab Emirates	United Arab Emirates	2023-09-28	28-Sep-2023	Female	0-1	SARI	B.D.E.1	GB5.0.5a
RSVB4-B49-02SV230010969	B	RSV-B	Human respiratory syncytial virus	Homo sapiens	United Arab Emirates	United Arab Emirates	2023-09-27	27-Sep-2023	Male	1-5	SARI	B.D.4.1.1	GB5.0.5a
RSVB4-B50-44SV230011124	B	RSV-B	Human respiratory syncytial virus	Homo sapiens	United Arab Emirates	United Arab Emirates	2023-10-01	01-Oct-2023	Male	1-5	SARI	B.D.E.1	GB5.0.5a
RSVB4-B51-02SV230011036	B	RSV-B	Human respiratory syncytial virus	Homo sapiens	United Arab Emirates	United Arab Emirates	2023-09-29	29-Sep-2023	Male	1-5	SARI	B.D.E.1	GB5.0.5a
RSVB4-B52-02SV230010968	B	RSV-B	Human respiratory syncytial virus	Homo sapiens	United Arab Emirates	United Arab Emirates	2023-09-28	28-Sep-2023	Male	1-5	SARI	B.D.4.1.1	GB5.0.5a
RSVB4-B53-44SV230007787	B	RSV-B	Human respiratory syncytial virus	Homo sapiens	United Arab Emirates	United Arab Emirates
RSVB4-B55-45SV230007399	B	RSV-B	Human respiratory syncytial virus	Homo sapiens	United Arab Emirates	United Arab Emirates	2023-06-24	24-Jun-2023	Female	10-18	ARI	B.D.4.1.1	GB5.0.5a
RSVB4-B57-44SV230016087	B	RSV-B	Human respiratory syncytial virus	Homo sapiens	United Arab Emirates	United Arab Emirates	2023-11-26	26-Nov-2023	Male	0-1	SARI	B.D.E.1	GB5.0.5a
